# Supplementary material for: Type I interferon is required for T helper (Th) 2 induction by dendritic cells
Source: PubMed Central journal article supplement (PMC5556270; doi:10.15252/embj.201695345), 2017-07-17
Supplement: EMBJ-36-2404-s001.pdf [file EMBJ-36-2404-s001.pdf]

## Expanded View Figures

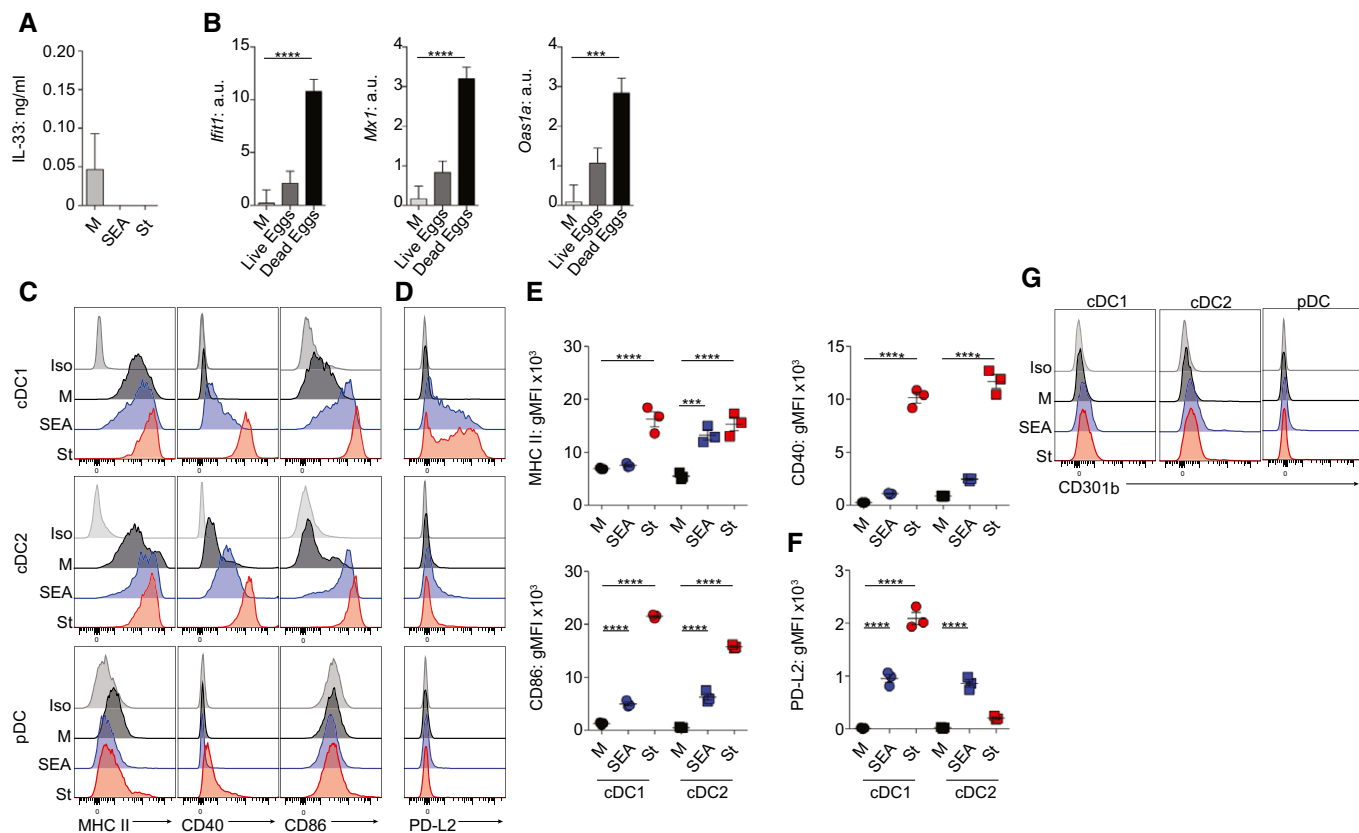

**Figure EV1. FLDCs' responses to Ag.**

- A IL-33 production by FLDCs cultured in medium alone (M) or with Ag.
- B WT FLDCs were cultured at a ratio of 1 live or dead egg: 500 DCs, or in medium alone (M), for 6 h for gene expression analysis (normalized against *Gapdh*, a.u.).
- C, D DC phenotype following overnight culture in medium alone (M, black), SEA (blue), or St (red). Isotype control (Iso, gray-shaded).
- E, F gMFI of surface markers for cDC1 and cDC2 FLDC subsets.
- G CD301b expression of FLDC subsets following 18-h culture in the presence or absence of Ag.

Data information: Results are mean  $\pm$  SEM (A, E, F) (one-way ANOVA) or least squares mean  $\pm$  SEM (B) (analyzed using a three-way full-factorial fit model, with contrast analysis used to test differences between experimental groups). \*\*\* $p < 0.001$ , \*\*\*\* $p < 0.0001$ . Data from one of three or more experiments ( $n = 3$  replicate wells per group) (A, C–G) or three experiments pooled ( $n = 7$ – $8$  replicate wells) (B). gMFI, geometric mean fluorescence intensity. a.u., arbitrary units.

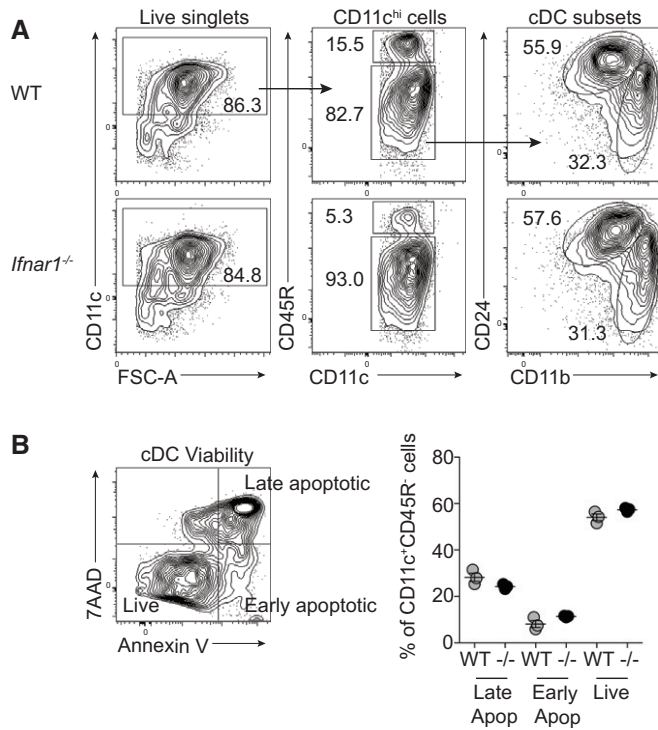

**Figure EV2. *Ifnar1*<sup>-/-</sup> FLDc display normal development and viability.**

**A** FLDc were cultured for 18 h in medium alone and analyzed for subsets by flow cytometry.

**B** Following 18-h culture, FLDc were stained with 7AAD and Annexin V to assess viability of cDC populations. 7AAD<sup>+</sup> Annexin V<sup>+</sup> were classed as late apoptotic, 7AAD<sup>-</sup> Annexin V<sup>+</sup> as early apoptotic, and 7AAD<sup>-</sup> Annexin V<sup>-</sup> as live cells. Results are mean ± SEM.

Data information: Data from one of three or more experiments (*n* = 3 replicate wells per group).

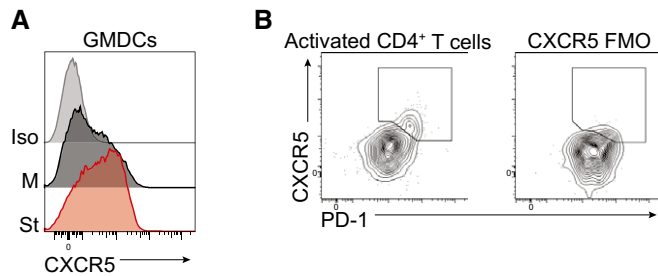

**Figure EV3. *St* elicits a strong upregulation of CXCR5 on the surface of GMDCs.**

**A** GMDCs were cultured for 18 h in medium alone (M) or in the presence of *St*, and the expression of CXCR5 was analyzed by flow cytometry and compared to an isotype control (Iso).

**B** Expression of CXCR5 and PD-1 on activated (CD44<sup>hi</sup> CD62L<sup>lo</sup>) CD4<sup>+</sup> Foxp3<sup>-</sup> T cells from hepatic LN of *Schistosoma mansoni*-infected mouse on day 42 of infection. FMO (fluorescence minus one) of CXCR5 expression.

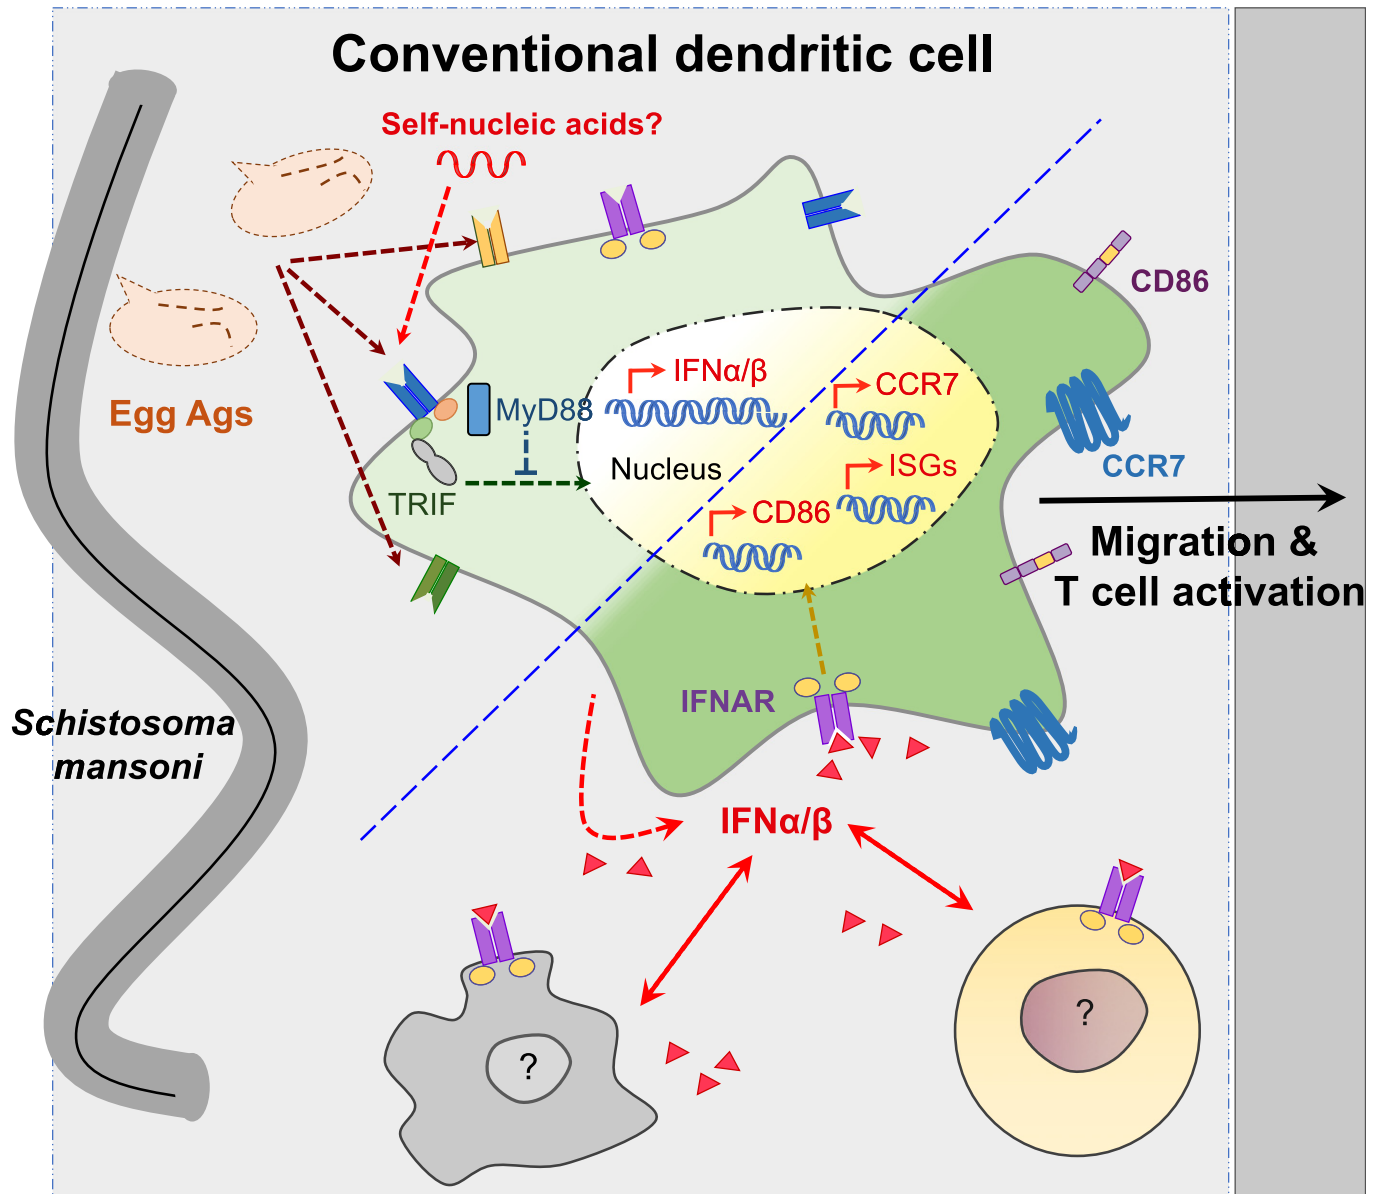

**Figure EV4.** A TRIF-dependent IFN-I signature is induced in response to *Schistosoma mansoni* egg Ags and is required for optimal DC activation, migration, and Th2 priming capacity.

Th2-inducing Ags, such as those released from *S. mansoni* eggs, bind to a range of Ag receptors on the surface of cDCs. Ags such as omega-1, which binds the mannose receptor, likely act in concert with parasite- and/or host-derived nucleic acid ligands that bind TRIF-dependent receptors and activate the transcription of IFN-I genes. This leads to the secretion of IFN-I, including IFN $\alpha$  subtypes and IFN $\beta$ . cDCs themselves express the IFN-I receptor IFNAR and can therefore respond to IFN-I produced from a range of sources including DCs and other immune cells. This stimulates the activation of IFN-dependent signaling pathways which leads to transcription of a range of IFN-dependent genes, including ISGs, and upregulation of surface markers such as CCR7 and CD86. In this way, IFN-I signaling enhances the activation, migration, and antigen presentation capabilities of cDCs during type 2 inflammation.
